# Supplementary material
Source: Springer Nature journal article supplement (https://www.springermedizin.de/resource/supplementary/13019_2013_1493_MOESM3_ESM.pdf/9640562)

S

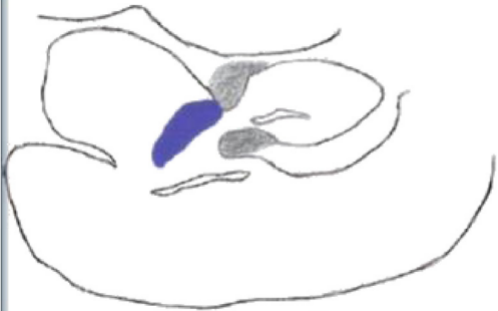

T

Supplement: MOESM3 [file 9640562]
